# Supplementary material
Source: PubMed Central journal article supplement (PMC9148381)
Supplement: NIHMS1752813-supplement-1.pdf [file NIHMS1752813-supplement-1.pdf]

**Supplemental Table 1.** Descriptive information on rates of abnormal screenings for each group by neurodevelopmental outcome.

| Cognitive tests (% abnormal screening) | Group                           |                              |                                  |                              |
|----------------------------------------|---------------------------------|------------------------------|----------------------------------|------------------------------|
|                                        | High-risk SCD +preterm (n = 20) | High-risk SCD +term (n = 60) | Lower-risk SCD +preterm (n = 11) | Lower-risk SCD +term (n= 98) |
| <b>Decision Speed</b>                  | 36% (7/19)                      | 16% (9/55)                   | 9% (1/11)                        | 10% (10/96)                  |
| <b>Applied Problems</b>                | 5% (1/20)                       | 14% (8/59)                   | 9% (1/11)                        | 2% (2/98)                    |
| <b>Grammatical Understanding</b>       | 25% (5/20)                      | 13% (8/60)                   | 0% (0/11)                        | 9% (9/98)                    |
| <b>Oral Vocabulary</b>                 | 30% (6/20)                      | 8% (5/60)                    | 0% (0/11)                        | 8% (8/98)                    |
| <b>Word Discrimination</b>             | 39% (7/18)                      | 16% (9/57)                   | 0% (0/11)                        | 19% (18/97)                  |
| <b>Letter-Word Identification</b>      | 15% (3/20)                      | 7% (4/59)                    | 9% (1/11)                        | 1% (1/98)                    |
| <b>DVTMI</b>                           | 21% (4/19)                      | 17% (10/60)                  | 0% (0/11)                        | 9% (9/98)                    |

Note.

DVTMI = Beery Developmental Test of Visual-Motor Integration
